# Supplementary material for: Can earlier BCG-Japan and OPV vaccination reduce early infant mortality? A cluster-randomised trial in Guinea-Bissau
Source: HighWire-hosted journal article supplement (doi:10.1136/bmjgh-2023-014044), 2024-02-01
Supplement: bmjgh-2023-014044supp004_data_supplement.pdf [file bmjgh-2023-014044supp004_data_supplement.pdf]

## Appendix 2 - Planned analyses

### 1 Baseline

#### Descriptive statistics:

For eligible children visited by a study nurse within 72 hours after birth, we will describe reasons for exclusion by group allocation.

Distribution of background factors will be presented by group allocation overall and by sex and region. Background factors will be summarised by counts (percentages), means (standard deviation) or medians (interquartile range) as appropriate. Information on the proportion with missing information will be provided.

**Table 1: Summary of background factors by intervention and control group**

|                                                                                                                                                                                                                                                                                                                                         |
|-----------------------------------------------------------------------------------------------------------------------------------------------------------------------------------------------------------------------------------------------------------------------------------------------------------------------------------------|
| <ul style="list-style-type: none"> <li>• Sex</li> <li>• Age at enrolment</li> <li>• Region</li> <li>• Weight at enrolment</li> <li>• Temperature</li> <li>• Mid-upper-arm circumference</li> <li>• Head circumference</li> <li>• Place of birth</li> <li>• Socioeconomic factors (maternal education and housing conditions)</li> </ul> |
|-----------------------------------------------------------------------------------------------------------------------------------------------------------------------------------------------------------------------------------------------------------------------------------------------------------------------------------------|

### 2 Primary analysis of primary outcome

The primary analysis of early infant non-accidental mortality will be assessed on a per-protocol (PP) analysis allowing for different baseline hazards according to factors used in the randomization (Region, pre-study mortality level (high/low)) and sex, thus allowing different baseline hazards for boys and girls. To account for clustering we will employ cluster-robust variance estimates.

For the primary outcome, we will use Cox proportional hazards models that allow different baseline hazards according to the above mentioned factors and with age as underlying time-scale. Deaths due to accidents will be censored.

The primary analysis of the primary outcome is described in more detail in table 2.

**Table 2: Primary analysis of primary outcome**

|            |                                                                                                 |
|------------|-------------------------------------------------------------------------------------------------|
| Population | Children visited within 72 hours after birth are eligible for the study.<br>Exclusion criteria: |
|------------|-------------------------------------------------------------------------------------------------|

|                                                                       |                                                                                                                                                                                                                                                                                                                                                                                                                   |
|-----------------------------------------------------------------------|-------------------------------------------------------------------------------------------------------------------------------------------------------------------------------------------------------------------------------------------------------------------------------------------------------------------------------------------------------------------------------------------------------------------|
|                                                                       | <ul style="list-style-type: none"> <li>- Children already BCG vaccinated</li> <li>- Moribund children (Expected not to survive the next 24 hours, as evaluated by the health facility nurse at the enrolment visit)</li> <li>- Children in rural villages where the BHP mobile teams coincidentally were in the village the same day (and vaccinated all children)</li> </ul>                                     |
| Observation period                                                    | <p>From: Enrolment visit or 24 hours after birth, whichever comes last<br/> To: 60 days of life<br/> Censoring, first of:</p> <ul style="list-style-type: none"> <li>- Visit by the BHP</li> <li>- 60 days</li> <li>- Death due to accident</li> <li>- Date of registering first non-trial vaccine given after enrolment</li> <li>- Migration (migration out of the study area as per HDSS definition)</li> </ul> |
| Time scale                                                            | Age                                                                                                                                                                                                                                                                                                                                                                                                               |
| Failure definition                                                    | Death                                                                                                                                                                                                                                                                                                                                                                                                             |
| Statistical tool                                                      | Cox proportional hazards model                                                                                                                                                                                                                                                                                                                                                                                    |
| Stratification                                                        | We will employ models that allow for different baseline hazards according to sex, region and pre-study mortality level                                                                                                                                                                                                                                                                                            |
| Clustering                                                            | We will use robust standard errors to account for clustering within village cluster                                                                                                                                                                                                                                                                                                                               |
| <u>Outline stata code</u><br>For analysis:<br><br>For model checking: | <pre>stset outdate, f(dead==1) enter (max(dob+1, date_enrol) /// exit (min ( dnasc+60, date_mobileteam) origin(dob)  stcox random, strata(sex reg prmorlev) vce(cl regam)  estat phtest, detail† stphplot, strata(random) adj(sex reg prmorlev) stcox random, strata(sex reg prmorlev) vce(cl regam) tvc(random) texp(_t)  *reg=region, prmorlev=pre-study mortality level, regam=village cluster</pre>           |

† If the proportional hazards assumption is not fulfilled we will still report the marginal hazard ratio but it will be supplemented by hazard ratios for two-three categorized time periods.

### 3 Effect-modifier analyses of primary outcome

We will assess whether the effect of the intervention on the primary effect measure is modified by the following potential effect modifiers.

**Table 3. Sex as a potential effect modifier of the primary outcome**

|                                                                        |                                                                                                                                                                                                                                                                                                                                                                                                                                                         |
|------------------------------------------------------------------------|---------------------------------------------------------------------------------------------------------------------------------------------------------------------------------------------------------------------------------------------------------------------------------------------------------------------------------------------------------------------------------------------------------------------------------------------------------|
| Potential effect modifier                                              | Sex                                                                                                                                                                                                                                                                                                                                                                                                                                                     |
| Design                                                                 | We will perform the analysis as describe above (for the primary analysis) allowing the effect of the intervention to differ between the sexes.                                                                                                                                                                                                                                                                                                          |
| Reasoning                                                              | Previous studies have found sex-differential non-specific effects <sup>1 2</sup> , therefore, we will assess the sex-differential effects.                                                                                                                                                                                                                                                                                                              |
| <u>Outline stata code:</u><br>For analysis:<br><br>For model checking: | <pre>stcox random#sex sex, strata(sex reg prmorlev) vce(cl regam) contrast random#sex</pre> <pre>estat phtest, detail† stphplot, strata(random_sex) adj(sex reg prmorlev) stcox random#sex sex, strata(sex reg prmorlev) vce(cl regam) /// tvc(random#sex sex) texp(_t)</pre> <p>*reg=region, prmorlev=pre-study mortality level, regam=village cluster, random_sex=a four-level variable based on the four possible combinations of random and sex</p> |

† If the proportional hazards assumption is not fulfilled we will still report the marginal hazard ratio but it will be supplemented by hazard ratios for two-three categorized time periods.

**Table 4. Maternal BCG scar as a potential effect modifier of the primary outcome**

|                                             |                                                                                                                                                                                                                                                                                           |
|---------------------------------------------|-------------------------------------------------------------------------------------------------------------------------------------------------------------------------------------------------------------------------------------------------------------------------------------------|
| Potential effect modifier                   | Maternal BCG scar (yes/no)                                                                                                                                                                                                                                                                |
| Design                                      | We will perform the analysis as described above (for the primary analysis) allowing the effect of the intervention to differ by maternal BCG-scar status                                                                                                                                  |
| Reasoning                                   | A recent randomized trial in Denmark found that the effect of BCG varied by whether the mother had received BCG or not <sup>3</sup> . Since, BCG scar is a life-long marker of a successful BCG-vaccination, we will assess whether the effect of BCG differs by maternal BCG-scar status |
| <u>Outline stata code:</u><br>For analysis: | <pre>stcox random#mBCGscar mBCGscar, strata(sex reg prmorlev) vce(cl regam)</pre>                                                                                                                                                                                                         |

|                     |                                                                                                                                                                                                                                                                                                                                                                                                                                                            |
|---------------------|------------------------------------------------------------------------------------------------------------------------------------------------------------------------------------------------------------------------------------------------------------------------------------------------------------------------------------------------------------------------------------------------------------------------------------------------------------|
| For model checking: | <pre>contrast random#mBCGscar  estat phtest, detail† stphplot, strata(random_mBCGscar) adj(sex reg prmorlev) stcox random#mBCGscar mBCGscar, strata(sex reg prmorlev) /// vce(cl regam) tvc(random#mBCGscar mBCGscar) texp(_t)  * mBCGscar= maternal BCG scar, reg=region, prmorlev=pre-study mortality level, regam=village cluster, random_mBCGscar=a four- level variable based on the four possible combinations of random and maternal BCG scar</pre> |
|---------------------|------------------------------------------------------------------------------------------------------------------------------------------------------------------------------------------------------------------------------------------------------------------------------------------------------------------------------------------------------------------------------------------------------------------------------------------------------------|

† If the proportional hazards assumption is not fulfilled we will still report the marginal hazard ratio but it will be supplemented by hazard ratios for two-three categorized time periods.

**Table 5. Low birthweight as a potential effect modifier of the primary outcome**

|                                                                        |                                                                                                                                                                                                                                                                                                                                                                                                                                                                           |
|------------------------------------------------------------------------|---------------------------------------------------------------------------------------------------------------------------------------------------------------------------------------------------------------------------------------------------------------------------------------------------------------------------------------------------------------------------------------------------------------------------------------------------------------------------|
| Potential effect modifier                                              | Low birthweight (<2500g: yes/no)                                                                                                                                                                                                                                                                                                                                                                                                                                          |
| Design                                                                 | We will perform the analysis as described above (for the primary analysis) allowing the effect of the intervention to differ by birthweight strata                                                                                                                                                                                                                                                                                                                        |
| Reasoning                                                              | Birthweight is an important risk factor for mortality. Previous randomised trials from Guinea-Bissau assessing the effect of BCG on mortality have been performed among low-birth-weight children.                                                                                                                                                                                                                                                                        |
| <u>Outline stata code:</u><br>For analysis:<br><br>For model checking: | <pre>stcox random#LBW LBW, strata(sex reg prmorlev) vce(cl regam) contrast random#LBW  estat phtest, detail† stphplot, strata(random_LBW) adj(sex reg prmorlev) stcox random#LBW LBW, strata(sex reg prmorlev) vce(cl regam) /// tvc(random#LBW LBW) texp(_t)  * LBW=Low birthweight, reg=region, prmorlev=pre-study mortality level, regam=village cluster, random_LBW=a four-level variable based on the four possible combinations of random and low birthweight</pre> |

† If the proportional hazards assumption is not fulfilled we will still report the marginal hazard ratio but it will be supplemented by hazard ratios for two-three categorized time periods.

**Table 6. Season as a potential effect modifier of the primary outcome**

|                                                                        |                                                                                                                                                                                                                                                                                                                                                                                                                                                                                       |
|------------------------------------------------------------------------|---------------------------------------------------------------------------------------------------------------------------------------------------------------------------------------------------------------------------------------------------------------------------------------------------------------------------------------------------------------------------------------------------------------------------------------------------------------------------------------|
| Potential effect modifier                                              | Season of birth (Dry: December-May/Rainy: June-November)                                                                                                                                                                                                                                                                                                                                                                                                                              |
| Design                                                                 | We will perform the analysis as described above (for the primary analysis) allowing the effect of the intervention to differ by season of birth                                                                                                                                                                                                                                                                                                                                       |
| Reasoning                                                              | Previous studies have found that the effect of some vaccines is stronger in the dry season <sup>4</sup> . Therefore, we would like to assess if the effect of BCG and OPV differs according to season.                                                                                                                                                                                                                                                                                |
| <u>Outline stata code:</u><br>For analysis:<br><br>For model checking: | <pre>stcox random#season season, strata(sex reg prmorlev) vce(cl regam) contrast random#season</pre> <pre>estat phtest, detail† stphplot, strata(random_season) adj(sex reg prmorlev) stcox random#season season, strata(sex reg prmorlev) vce(cl regam) /// tvc(random#season season) texp(_t)</pre> <p>*reg=region, prmorlev=pre-study mortality level, regam=village cluster, random_season=a four-level variable based on the four possible combinations of random and season</p> |

† If the proportional hazards assumption is not fulfilled we will still report the marginal hazard ratio but it will be supplemented by hazard ratios for two-three categorized time periods.

#### 4 Primary analyses of secondary outcomes

##### *Non-accident morbidity*

Since it can be difficult to distinguish between hospital admissions and outpatient contact through interviews, we have defined hospital admissions as an overnight stay in a health facility. Hospital admissions due to accidents are ignored but the follow-up time is (interval) censored while the child is admitted.

**Table 7: Non-accident hospitalisation**

|                    |                                                                                                                                                                                                                                                                                                                                     |
|--------------------|-------------------------------------------------------------------------------------------------------------------------------------------------------------------------------------------------------------------------------------------------------------------------------------------------------------------------------------|
| Population         | Identical to primary analysis of primary outcome                                                                                                                                                                                                                                                                                    |
| Observation period | From: Enrolment visit or 24 hours after birth, whichever comes last<br>To: 60 days of life<br>Censoring, first of: <ul style="list-style-type: none"> <li>- Visit by the BHP</li> <li>- Date of registering first non-trial vaccine given after enrolment</li> <li>- Death</li> <li>- Hospital admission due to accident</li> </ul> |

|                                                                       |                                                                                                                                                                                                                                                                                                                                                                                                         |
|-----------------------------------------------------------------------|---------------------------------------------------------------------------------------------------------------------------------------------------------------------------------------------------------------------------------------------------------------------------------------------------------------------------------------------------------------------------------------------------------|
|                                                                       | <ul style="list-style-type: none"> <li>- 60 days</li> <li>- Migration (migration out of the study area as per HDSS definition)</li> </ul>                                                                                                                                                                                                                                                               |
| Time scale                                                            | Age                                                                                                                                                                                                                                                                                                                                                                                                     |
| Failure definition                                                    | First hospital admission – only overnight hospitalisations or arrival at the hospital and death within the first day will be considered in this analysis.                                                                                                                                                                                                                                               |
| Statistical tool                                                      | Cox proportional hazards model                                                                                                                                                                                                                                                                                                                                                                          |
| Stratification                                                        | We will employ models that allow for different baseline hazards according to sex, region and pre-study mortality level                                                                                                                                                                                                                                                                                  |
| Clustering                                                            | We will use robust standard errors to account for clustering within village cluster                                                                                                                                                                                                                                                                                                                     |
| <u>Outline stata code</u><br>For analysis:<br><br>For model checking: | <pre>stset outdate, f(hosp==1) enter (max(dob+1, date_enrol) /// exit (min ( dnasc+60, date_mobileteam) origin(dob)  stcox random, strata(sex reg prmorlev) vce(cl regam)  estat phtest, detail† stphplot, strata(random) adj(sex reg prmorlev) stcox random, strata(sex reg prmorlev) vce(cl regam) tvc(random) texp(_t)  *reg=region, prmorlev=pre-study mortality level, regam=village cluster</pre> |

† If the proportional hazards assumption is not fulfilled we will still report the marginal hazard ratio but it will be supplemented by hazard ratios for two-three categorized time periods.

### Severe morbidity

We will evaluate the effect on severe morbidity considered as the composite outcome of non-accidental death and non-accidental hospital admission. Since it can be difficult to distinguish between hospital admissions and outpatient contact through interviews, we have defined hospital admissions as an overnight stay in a health facility. Hospital admissions due to accidents are ignored but the follow-up time is (interval) censored while the child is admitted. The potential effect modifiers for the primary outcome specified in tables 3-6 will also be assessed for the composite outcome.

**Table 8: Severe morbidity**

|                    |                                                                     |
|--------------------|---------------------------------------------------------------------|
| Population         | Identical to primary analysis of primary outcome                    |
| Observation period | From: Enrolment visit or 24 hours after birth, whichever comes last |

|                                            |                                                                                                                                                                                                                                                                                                                                                       |
|--------------------------------------------|-------------------------------------------------------------------------------------------------------------------------------------------------------------------------------------------------------------------------------------------------------------------------------------------------------------------------------------------------------|
|                                            | To: 60 days of life<br>Censoring, first of:<br><ul style="list-style-type: none"> <li>- Visit by the BHP</li> <li>- Date of registering first non-trial vaccine given after enrolment</li> <li>- Death/Hospital admission due to accident</li> <li>- 60 days</li> <li>- Migration (migration out of the study area as per HDSS definition)</li> </ul> |
| Time scale                                 | Age                                                                                                                                                                                                                                                                                                                                                   |
| Failure definition                         | Death or first hospital admission                                                                                                                                                                                                                                                                                                                     |
| Statistical tool                           | Cox proportional hazards model                                                                                                                                                                                                                                                                                                                        |
| Stratification                             | We will employ models that allow for different baseline hazards according to sex, region and pre-study mortality level                                                                                                                                                                                                                                |
| Clustering                                 | We will use robust standard errors to account for clustering within village cluster                                                                                                                                                                                                                                                                   |
| <u>Outline stata code:</u><br>For analysis | stset outdate, f(event==1) enter (max(dob+1, date_enrol) ///<br>exit (min ( dnasc+60, date_mobileteam) origin(dob)<br><br>stcox random, strata(sex reg prmorlev) vce(cl regam)                                                                                                                                                                        |
| For model checking                         | estat phtest, detail†<br>stphplot, strata(random) adj(sex reg prmorlev)<br>stcox random, strata(sex reg prmorlev) vce(cl regam) tvc(random)<br>texp(_t)<br><br>*reg=region, prmorlev=pre-study mortality level, regam=village cluster                                                                                                                 |

† If the proportional hazards assumption is not fulfilled we will still report the marginal hazard ratio but it will be supplemented by hazard ratios for two-three categorized time periods.

**Table 9: All-cause consultations**

|                    |                                                                                                                                                                                                                                                                                            |
|--------------------|--------------------------------------------------------------------------------------------------------------------------------------------------------------------------------------------------------------------------------------------------------------------------------------------|
| Population         | Identical to primary analysis of primary outcome                                                                                                                                                                                                                                           |
| Observation period | From: Enrolment visit or 24 hours after birth, whichever comes last<br>To: 60 days of life<br>Censoring, first of:<br><ul style="list-style-type: none"> <li>- Visit by the BHP</li> <li>- Date of registering first non-trial vaccine given after enrolment</li> <li>- 60 days</li> </ul> |

|                    |                                                                                                                                                                   |
|--------------------|-------------------------------------------------------------------------------------------------------------------------------------------------------------------|
|                    | <ul style="list-style-type: none"> <li>- Migration (migration out of the study area as per HDSS definition)</li> <li>- Death</li> <li>- End of study</li> </ul>   |
| Failure definition | An out-patient consultation within the observation period                                                                                                         |
| Statistical tool   | Log-binomial regression                                                                                                                                           |
| Adjustment         | We will adjust the analysis for sex, region and pre-study mortality level                                                                                         |
| Clustering         | We will use robust standard errors to account for clustering within village cluster                                                                               |
| Stata code         | Binreg cons random sex b1.reg prmorlev, rr vce(cl regam)<br>*cons=out-patient consultation, reg=Region, prmorlev=Pre-study mortality level, regam=village cluster |

*Growth***Table 10: Mid-upper-arm circumference (MUAC)**

|                        |                                                                                                                                                                                                                      |
|------------------------|----------------------------------------------------------------------------------------------------------------------------------------------------------------------------------------------------------------------|
| Population             | Identical to primary analysis of primary outcome                                                                                                                                                                     |
| Observation time point | First visit by the mobile teams                                                                                                                                                                                      |
| Growth measures        | MUAC will be analysed using the measured value                                                                                                                                                                       |
| Statistical tool       | Linear regression                                                                                                                                                                                                    |
| Adjustment             | We will adjust the analysis for MUAC at enrolment, age at MUAC measurement, sex, region and pre-study mortality level                                                                                                |
| Clustering             | We will use robust standard errors to account for clustering within village cluster                                                                                                                                  |
| Stata code             | Regress MUAC random sex b1.reg prmorlev MUACenrol MUACage, /// vce(cl regam)<br>*reg=region, prmorlev=pre-study mortality level, MUACenrol=MUAC at enrolment, MUACage= age at MUAC assessment, regam=village cluster |

**Table 11: Weight-for-age z-score**

|                        |                                                                                                        |
|------------------------|--------------------------------------------------------------------------------------------------------|
| Population             | Identical to primary analysis of primary outcome                                                       |
| Observation time point | First visit by the mobile teams                                                                        |
| Growth measures        | Weight will be analysed using the WHO weight-for-age z-score                                           |
| Statistical tool       | Linear regression                                                                                      |
| Adjustment             | We will adjust the analysis for weight-for-age at enrolment, sex, region and pre-study mortality level |
| Clustering             | We will use robust standard errors to account for clustering within village cluster                    |

|            |                                                                                                                                                                                                                                                                           |
|------------|---------------------------------------------------------------------------------------------------------------------------------------------------------------------------------------------------------------------------------------------------------------------------|
| Stata code | Regress w-z-score random w-z-enrol sex b1.reg prmorlev, vce(cl regam)<br>*w-z-score=weight-for-age z-score at first visit by the mobile teams,<br>w-z-enrol=weight-for-age z-score at enrolment, reg=region,<br>prmorlev=pre-study mortality level, regam=village cluster |
|------------|---------------------------------------------------------------------------------------------------------------------------------------------------------------------------------------------------------------------------------------------------------------------------|

*BCG scarring***Table 12: BCG scarring**

|                       |                                                                                                                                    |
|-----------------------|------------------------------------------------------------------------------------------------------------------------------------|
| Population            | Identical to primary analysis of primary outcome                                                                                   |
| Observation timepoint | First visit after 6 months of age                                                                                                  |
| Failure definition    | Scar (yes/no)                                                                                                                      |
| Statistical tool      | Log-binominal regression                                                                                                           |
| Adjustment            | We will adjust the analysis for sex, region and pre-study mortality level                                                          |
| Clustering            | We will use robust standard errors to account for clustering within village cluster                                                |
| Stata code            | Binreg scar random sex b1.reg prmorlev, rr vce(cl regam)<br>*reg=region, prmorlev=pre-study mortality level, regam=village cluster |

*Cost-effectiveness of providing BCG and OPV at birth*

A cost effectiveness analysis seeking to measure the cost per death averted using a societal perspective will be performed, contrasting the costs of vaccine provision in the present programme and an outreach system as tested in the trial. The costs/savings associated with different rates of consultations and admissions will also be taken into account.

*Suppurative lymphadenitis*

We will assess the incidence of suppurative lymphadenitis as a reaction to BCG vaccination in the intervention and control clusters. Other serious adverse events to the BCG and OPV vaccine will be captured through the outcome measures (mortality, hospital admission and consultations).

**5 Sensitivity analyses to test for robustness of conclusions****Table 13: Cause-specific death**

|                    |                                                                                                                    |
|--------------------|--------------------------------------------------------------------------------------------------------------------|
| Population         | Identical to primary analysis of primary outcome                                                                   |
| Observation period | From: Enrolment visit or 24 hours after birth, whichever comes last<br>To: 60 days of life<br>Censoring, first of: |

|                           |                                                                                                                                                                                                                                                                                     |
|---------------------------|-------------------------------------------------------------------------------------------------------------------------------------------------------------------------------------------------------------------------------------------------------------------------------------|
|                           | <ul style="list-style-type: none"> <li>- Visit by the BHP</li> <li>- 60 days</li> <li>- Death due to accident</li> <li>- Date of registering first non-trial vaccine given after enrolment</li> <li>- Migration (migration out of the study area as per HDSS definition)</li> </ul> |
| Time scale                | Age                                                                                                                                                                                                                                                                                 |
| Failure definition        | Death due to:<br>Malaria, Respiratory Infection, Sepsis, Gastrointestinal disease, Other                                                                                                                                                                                            |
| Statistical tool          | Cox proportional hazards model                                                                                                                                                                                                                                                      |
| Stratification            | We will employ models that allow for different baseline hazards according to sex, region and pre-study mortality level                                                                                                                                                              |
| Clustering                | We will use robust standard errors to account for clustering within village cluster                                                                                                                                                                                                 |
| <u>Outline stata code</u> |                                                                                                                                                                                                                                                                                     |
| For analysis:             | <pre>stset outdate, f(event==1&amp;cause==X) enter (max(dob+1, date_enrol) /// exit (min (dnasc+60, date_mobileteam) origin(dob)  stcox random, strata(sex reg prmorlev) vce(cl regam)</pre>                                                                                        |
| For model checking:       | <pre>estat phtest, detail† stphplot, strata(random) adj(sex reg prmorlev) stcox random, strata(sex reg prmorlev) vce(cl regam) tvc(random) texp(_t)  *reg=region, prmorlev=pre-study mortality level, regam=village cluster</pre>                                                   |

† If the proportional hazards assumption is not fulfilled we will still report the marginal hazard ratio but it will be supplemented by hazard ratios for two-three categorized time periods.

In sensitivity analyses, we will furthermore, assess whether the conclusions are robust to the following:

- Censoring follow-up at general health intervention campaigns (e.g. OPV campaigns)
- Altering the population to using an intention-to-treat approach, including all children, who had a home visit by a study nurse (i.e., including children who did not receive assigned treatment, children who were not enrolled because they were moribund, or who did not accept to participate).

- Altering the outcome from non-accidental mortality to all-cause mortality including also deaths due to accidents.
- For the non-accident hospitalisations, we will perform the analyses allowing for repeated hospitalisations. A child will return to the at-risk population the day after discharge from the hospital.

## References

1. Benn CS, Netea MG, Selin LK, et al. A small jab - a big effect: nonspecific immunomodulation by vaccines. *Trends in immunology* 2013;34(9):431-9. doi: 10.1016/j.it.2013.04.004
2. Aaby P, Benn CS. Non-specific and sex-differential effects of routine vaccines: what evidence is needed to take these effects into consideration in low-income countries? *Human vaccines* 2011;7(1):120-4. [published Online First: 2011/02/01]
3. Stensballe LG, Ravn H, Birk NM, et al. BCG Vaccination at Birth and Rate of Hospitalization for Infection Until 15 Months of Age in Danish Children: A Randomized Clinical Multicenter Trial. *J Pediatric Infect Dis Soc* 2018;0(0):1-8. doi: 10.1093/jpids/piy029 [published Online First: 2018/04/11]
4. Martins CL, Benn CS, Andersen A, et al. A randomized trial of a standard dose of Edmonston-Zagreb measles vaccine given at 4.5 months of age: effect on total hospital admissions. *J Infect Dis* 2014;209(11):1731-8. doi: 10.1093/infdis/jit804 [published Online First: 2014/01/18]
