# Supplementary material for: Can earlier BCG-Japan and OPV vaccination reduce early infant mortality? A cluster-randomised trial in Guinea-Bissau
Source: HighWire-hosted journal article supplement (doi:10.1136/bmjgh-2023-014044), 2024-02-01
Supplement: bmjgh-2023-014044supp005_data_supplement.pdf [file bmjgh-2023-014044supp005_data_supplement.pdf]

**Supplementary table 1. Effect of providing BCG and OPV vaccines at a home visit on non-accidental mortality when follow-up is censored at day 10 of life**

|              | n    | MR per 1000 PYRS<br>(deaths/PYRS) | HR (95% CI)        |
|--------------|------|-----------------------------------|--------------------|
| Intervention | 1006 | 313.5 (7/22)                      | 0.66 (0.26 - 1.66) |
| Control      | 1206 | 780.7 (20/26)                     | Reference          |
| <b>Rural</b> |      |                                   |                    |
| Intervention | 683  | 403.2 (6/15)                      | 0.60 (0.23 - 1.61) |
| Control      | 976  | 957.8 (20/21)                     | Reference          |
| <b>Urban</b> |      |                                   |                    |
| Intervention | 323  | 134.2 (1/7)                       | NA                 |
| Control      | 230  | 0.0 (0/5)                         | Reference          |

MR: Mortality rate, PYRS: Person years, HR: Hazard ratio, CI: Confidence interval, NA: Not applicable
