# Supplementary material for: Can earlier BCG-Japan and OPV vaccination reduce early infant mortality? A cluster-randomised trial in Guinea-Bissau
Source: HighWire-hosted journal article supplement (doi:10.1136/bmjgh-2023-014044), 2024-02-01
Supplement: bmjgh-2023-014044supp007_data_supplement.pdf [file bmjgh-2023-014044supp007_data_supplement.pdf]

**Supplementary table 3. Effect of providing BCG and OPV vaccines at a home visit on neonatal mortality**

|              | n    | MR per 1000 PYRS<br>(deaths/PYRS) | HR (95% CI)        |
|--------------|------|-----------------------------------|--------------------|
| Intervention | 1007 | 110.2 (7/64)                      | 0.50 (0.21 - 1.21) |
| Control      | 1208 | 357.3 (24/67)                     | Reference          |
| <b>Rural</b> |      |                                   |                    |
| Intervention | 684  | 148.3 (6/40)                      | 0.45 (0.18 - 1.16) |
| Control      | 978  | 424.9 (24/56)                     | Reference          |
| <b>Urban</b> |      |                                   |                    |
| Intervention | 323  | 43.4 (1/23)                       | NA                 |
| Control      | 230  | 0.0 (0/11)                        | Reference          |

MR: Mortality rate, PYRS: Person years, HR: Hazard ratio, CI: Confidence interval, NA: Not applicable
