# Supplementary material for: Can earlier BCG-Japan and OPV vaccination reduce early infant mortality? A cluster-randomised trial in Guinea-Bissau
Source: HighWire-hosted journal article supplement (doi:10.1136/bmjgh-2023-014044), 2024-02-01
Supplement: bmjgh-2023-014044supp008_data_supplement.pdf [file bmjgh-2023-014044supp008_data_supplement.pdf]

**Supplementary table 4. Effect of BCG and OPV vaccines provided at a home visit on non-accidental mortality, with follow-up censored at vaccination campaigns**

|              | n    | MR per 1000 PYRS<br>(deaths/PYRS) | HR (95% CI)        |
|--------------|------|-----------------------------------|--------------------|
| Intervention | 986  | 63.5 (6/95)                       | 0.37 (0.15 - 0.88) |
| Control      | 1193 | 290.3 (27/93)                     | Reference          |
| <b>Rural</b> |      |                                   |                    |
| Intervention | 670  | 86.2 (5/58)                       | 0.32 (0.12 - 0.83) |
| Control      | 966  | 341.5 (27/79)                     | Reference          |
| <b>Urban</b> |      |                                   |                    |
| Intervention | 316  | 27.4 (1/36)                       | NA                 |
| Control      | 227  | 0.0 (0/14)                        | Reference          |

MR: Mortality rate, PYRS: Person years, HR: Hazard ratio, CI: Confidence interval, NA: Not applicable
