# Supplementary material for: Can earlier BCG-Japan and OPV vaccination reduce early infant mortality? A cluster-randomised trial in Guinea-Bissau
Source: HighWire-hosted journal article supplement (doi:10.1136/bmjgh-2023-014044), 2024-02-01
Supplement: bmjgh-2023-014044supp010_data_supplement.pdf [file bmjgh-2023-014044supp010_data_supplement.pdf]

**Supplementary table 6. Effect of BCG and OPV vaccines provided at a home visit on non-accidental mortality in the intention-to-treat cohort**

|              | n    | MR per 1000 PYRS<br>(deaths/PYRS) | HR (95% CI)        |
|--------------|------|-----------------------------------|--------------------|
| Intervention | 1018 | 65.8 (7/106)                      | 0.38 (0.17 - 0.84) |
| Control      | 1224 | 282.6 (29/103)                    | Reference          |
| <b>Rural</b> |      |                                   |                    |
| Intervention | 691  | 94.3 (6/64)                       | 0.34 (0.15 - 0.79) |
| Control      | 992  | 335.9 (29/86)                     | Reference          |
| <b>Urban</b> |      |                                   |                    |
| Intervention | 327  | 23.4 (1/43)                       | NA                 |
| Control      | 232  | 0.0 (0/16)                        | Reference          |

MR: Mortality rate, PYRS: Person years, HR: Hazard ratio, CI: Confidence interval, NA: Not applicable
