# Supplementary material for: Can earlier BCG-Japan and OPV vaccination reduce early infant mortality? A cluster-randomised trial in Guinea-Bissau
Source: HighWire-hosted journal article supplement (doi:10.1136/bmjgh-2023-014044), 2024-02-01
Supplement: bmjgh-2023-014044supp011_data_supplement.pdf [file bmjgh-2023-014044supp011_data_supplement.pdf]

**Supplementary table 7. Effect of providing BCG and OPV vaccines at a home visit on growth**

|              | MUAC enrolment<br>Mean (SD) | MUAC follow-up*<br>Mean (SD) | Difference in MUAC at follow-up<br>(95% CI) | WAZ enrolment<br>Z-score (SD) | WAZ follow-up*<br>Z-score (SD) | Difference in WAZ at follow-up<br>(95% CI) |
|--------------|-----------------------------|------------------------------|---------------------------------------------|-------------------------------|--------------------------------|--------------------------------------------|
| Intervention | 98 (9)                      | 118 (14)                     | 0.82 (-0.39 - 2.03)                         | -0.78 (1.01)                  | -0.50 (1.08)                   | 0.04 (-0.05 - 0.13)                        |
| Control      | 97 (10)                     | 115 (14)                     | Reference                                   | -0.91 (1.04)                  | -0.67 (1.10)                   | Reference                                  |
| <b>Rural</b> |                             |                              |                                             |                               |                                |                                            |
| Intervention | 97 (9)                      | 114 (13)                     | 1.02 (-0.43 - 2.46)                         | -0.83 (1.02)                  | -0.59 (1.11)                   | 0.05 (-0.06 - 0.17)                        |
| Control      | 97 (10)                     | 112 (13)                     | Reference                                   | -0.96 (1.03)                  | -0.76 (1.10)                   | Reference                                  |
| <b>Urban</b> |                             |                              |                                             |                               |                                |                                            |
| Intervention | 98 (8)                      | 126 (10)                     | -0.28 (-2.48 - 1.91)                        | -0.67 (0.98)                  | -0.33 (1.01)                   | -0.02 (-0.19 - 0.15)                       |
| Control      | 99 (11)                     | 126 (11)                     | Reference                                   | -0.70 (1.02)                  | -0.33 (1.06)                   | Reference                                  |

MUAC: Mid-upper-arm circumference, SD: Standard deviation, CI: Confidence interval, WAZ: Weight-for-age Z-score

\* Measured at first follow-up visit within 6 months of age.
