# Supplementary material for: Can earlier BCG-Japan and OPV vaccination reduce early infant mortality? A cluster-randomised trial in Guinea-Bissau
Source: HighWire-hosted journal article supplement (doi:10.1136/bmjgh-2023-014044), 2024-02-01
Supplement: bmjgh-2023-014044supp012_data_supplement.pdf [file bmjgh-2023-014044supp012_data_supplement.pdf]

**Supplementary table 8. Adverse events (lymphadenitis and suppurative lymphadenitis)**

|              | n    | Lymphadenitis<br>n(%) | Suppurative lymphadenitis<br>n(%) |
|--------------|------|-----------------------|-----------------------------------|
| Intervention | 887  | 3 (0%)                | 0 (0%)                            |
| Control      | 1046 | 0 (0%)                | 0 (0%)                            |
| <b>Rural</b> |      |                       |                                   |
| Intervention | 592  | 0 (0%)                | 0 (0%)                            |
| Control      | 845  | 0 (0%)                | 0 (0%)                            |
| <b>Urban</b> |      |                       |                                   |
| Intervention | 295  | 3 (1%)                | 0 (0%)                            |
| Control      | 201  | 0 (0%)                | 0 (0%)                            |
